# Supplementary material for: Direct analysis of herbicides by paper spray ionization mass spectrometry
Source: Royal Society of Chemistry journal article supplement (doi:10.1039/c5ay02125a), 2015-01-01
Supplement: c5ay02125a1.pdf [file c5ay02125a1.pdf]

**Supporting Information:**

**Direct analysis of herbicides by paper spray ionization mass spectrometry**

Steven L. Reeber,<sup>†</sup> Sneha Gadi,<sup>†</sup> Sung-Ben Huang,<sup>‡</sup> Gary L. Glish<sup>\*,†</sup>

<sup>†</sup>Department of Chemistry, The University of North Carolina at Chapel Hill, Chapel Hill NC,

27599

<sup>‡</sup>Syngenta Crop Protection LLC, Greensboro NC, 27409

\*Corresponding author. Email: [glish@unc.edu](mailto:glish@unc.edu)

Six pages; four figures and five tables.

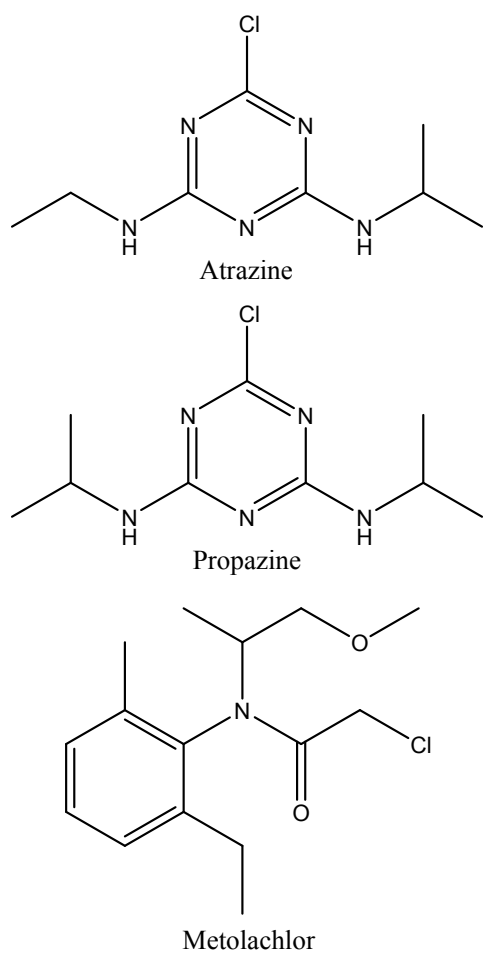

**Figure S1:** The herbicides investigated in this study: three triazine herbicides and the chloroacetanilide herbicide metolachlor.

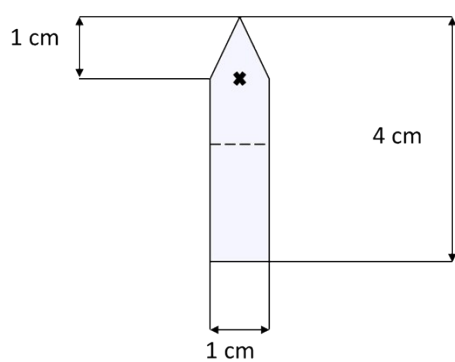

**Figure S2:** Paper strip design.

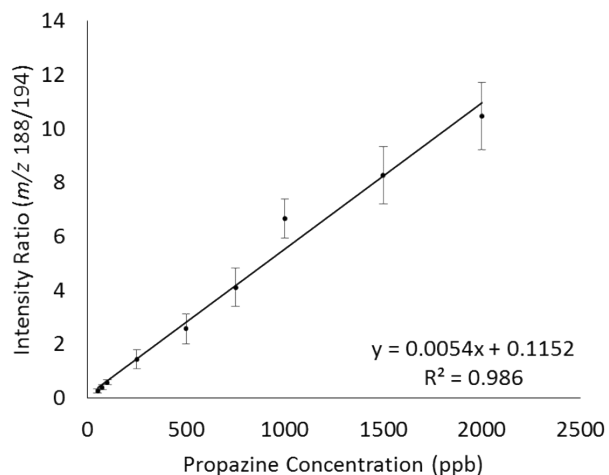

**Figure S3:** Calibration curve for quantitation of propazine in ground water.

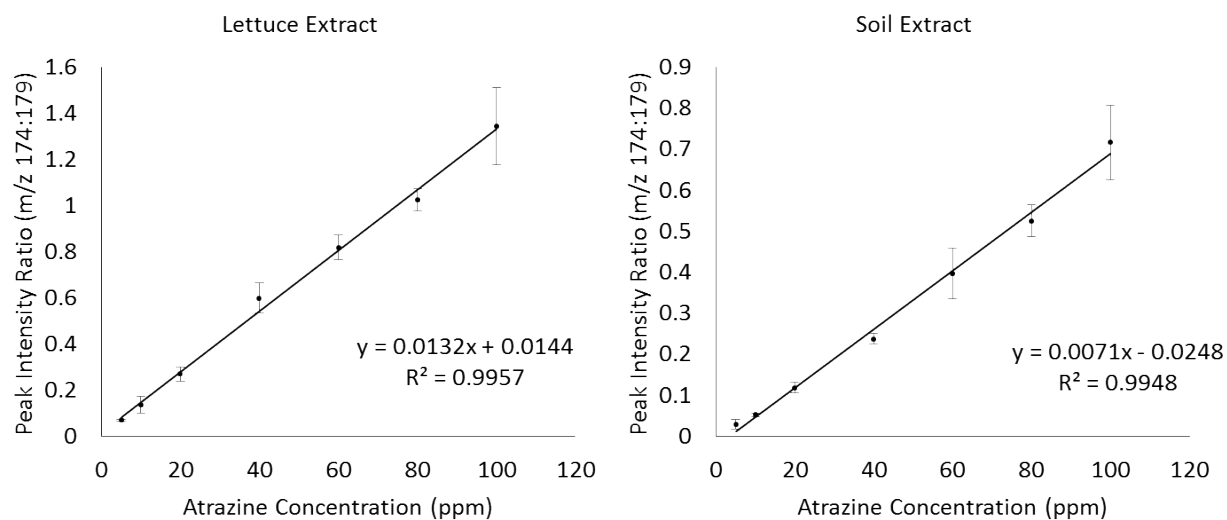

**Figure S4:** Atrazine calibration curves in from 5-100 ppm in soil and lettuce extracts.

Measurements included in these curves were performed using an earlier version of the paper spray ion source.

**Table S1:** Typical mass spectrometer settings for paper spray of herbicides.

| Parameter                              | Setting     |
|----------------------------------------|-------------|
| Inlet Capillary                        | -3833 V     |
| Capillary Exit                         | 158.3 V     |
| Skimmer                                | 46.2 V      |
| Octopole 1 dc                          | 17.26 V     |
| Octopole 2 dc                          | 6.06 V      |
| Octopole RF Amplitude                  | 179.2 Vpp   |
| Lens 1                                 | -9.0 V      |
| Lens 2                                 | -74.5 V     |
| Trap Drive                             | 44.1        |
| MS/MS Amplitude                        | 1.40-1.70 V |
| Low Mass Cutoff (% of parent ion mass) | 40%         |

**Table S2:** Atrazine QC measurements.

|               | Unweighted |        | 1/x      |        | 1/x <sup>2</sup> |        |       |
|---------------|------------|--------|----------|--------|------------------|--------|-------|
| Concentration | Value      | Error  | Value    | Error  | Value            | Error  | % RSD |
| 3 ppb         | 8.44 ppb   | 181 %  | 3.06 ppb | 1.89 % | 4.11 ppb         | 37.0 % | 61.9% |
| 60 ppb        | 86.7 ppb   | 44.6 % | 83.8 ppb | 39.6 % | 60.3 ppb         | 0.58 % | 3.7%  |
| 150 ppb       | 210 ppb    | 40.2 % | 211 ppb  | 40.6 % | 149 ppb          | 0.69 % | 8.4%  |
| 400 ppb       | 456 ppb    | 14.1 % | 465 ppb  | 16.1 % | 326 ppb          | 18.6%  | 13.1% |

**Table S3:** Equations for weighted linear fits to atrazine calibration curve.

| Weighting        | Equation                                                        |
|------------------|-----------------------------------------------------------------|
| Unweighted       | Signal Ratio = 0.001295 x C <sub>atrazine, ppb</sub> + 0.007027 |
| 1/x              | Signal Ratio = 0.001257 x C <sub>atrazine, ppb</sub> + 0.014122 |
| 1/x <sup>2</sup> | Signal Ratio = 0.001804 x C <sub>atrazine, ppb</sub> + 0.010548 |

**Table S4:** Metolachlor QC measurements.

|               | Unweighted |        | 1/x      |        | 1/x <sup>2</sup> |        |        |
|---------------|------------|--------|----------|--------|------------------|--------|--------|
| Concentration | Value      | Error  | Value    | Error  | Value            | Error  | % RSD  |
| 750 ppt       | 4.42 ppb   | 490 %  | 399 ppt  | 46.9 % | 480 ppt          | 36.0 % | 6.06 % |
| 15 ppb        | 20.9 ppb   | 39.5 % | 17.6 ppb | 17.2 % | 14.3 ppb         | 4.22 % | 34.1 % |
| 100 ppb       | 96.1 ppb   | 3.86 % | 95.9 ppb | 4.08 % | 77.5 ppb         | 22.5 % | 10.4 % |
| 250 ppb       | 244 ppb    | 2.32 % | 250 ppb  | 0.05 % | 202 ppb          | 19.2 % | 23.3 % |

**Table S5:** Equations for weighted linear fits to metolachlor calibration curve.

| Weighting        | Equation                                                                |
|------------------|-------------------------------------------------------------------------|
| Unweighted       | Signal Ratio = $0.003255 \times C_{\text{metolachlor, ppb}} - 0.002880$ |
| 1/x              | Signal Ratio = $0.003125 \times C_{\text{metolachlor, ppb}} + 0.010268$ |
| 1/x <sup>2</sup> | Signal Ratio = $0.003874 \times C_{\text{metolachlor, ppb}} + 0.009652$ |
